# Supplementary material for: MLN0128, a novel mTOR kinase inhibitor, disrupts survival signaling and triggers apoptosis in AML and AML stem/ progenitor cells
Source: PubMed Central journal article supplement (PMC5342403; doi:10.18632/oncotarget.10397), 2016-07-04
Supplement: oncotarget-07-55083-s001.pdf [file oncotarget-07-55083-s001.pdf]

# MLN0128, a novel mTOR kinase inhibitor, disrupts survival signaling and triggers apoptosis in AML and AML stem/progenitor cells

## SUPPLEMENTARY MATERIALS AND METHODS

### Materials

MLN0128 was provided by Millennium Pharmaceuticals (Cambridge, MA), vorinostat and dasatinib were purchased from LC Laboratories (Woburn, MA), ruxolitinib (INCB018424) was from Selleck (Boston, MA), and rapamycin was purchased from Sigma-Aldrich (St. Louis, MO). Antibodies used in Western blot and flow cytometry analyses were obtained from Cell Signaling Technology (Danvers, MA), Abcam (Cambridge, MA), BD Pharmingen (Franklin Lakes, NJ), eBioscience (San Diego, CA), and Biologend (San Diego, CA). All metal-conjugated antibodies, metal-labeling kits, and Ir-intercalator used in the CyTOF experiments were purchased from Fluidigm Corporation (South San Francisco, CA). Paraformaldehyde (PFA) was from Electron Microscopy Sciences (Hatfield, PA). Stem cell growth factor (SCF) and IL-6 were purchased from Thermo Fisher Scientific (Grand Island, NY); GM-CSF was from Immunex Corporation (Seattle, WA).

### Cell lines and culture

OCI-AML3 was provided by Dr. Mark Minden (Ontario Cancer Institute, Toronto, Ontario, Canada). U937, MV4-11, and MOLM13 were purchased from American Type Culture Collection (Manassas, VA). All cell lines were cultured in RPMI 1640 medium (Mediatech, Inc. Manassas, VA) supplemented with 10% fetal bovine serum (FBS; Gemini Bio-Products, Woodland, CA), 1 mmol/L L-glutamine and 50 µg/mL penicillin-streptomycin (all from Thermo Fisher Scientific) and incubated at 37°C in 21% O<sub>2</sub> and 5% CO<sub>2</sub> condition. For experiments involving hypoxic conditions (1% O<sub>2</sub>), cells were incubated in the hypoxic Workstation INVIVO2 400 (Ruskin Technology, Bridgend, Mid Glamorgan CF31 3TB, United Kingdom) for the indicated time period.

### Human subjects

Peripheral blood and bone marrow samples were obtained from AML patients after informed consent had been obtained in accordance with The University of Texas MD Anderson Cancer Center (Houston, Texas) institutional review board regulations (Supplementary Table S1). Mononuclear cells in primary samples were separated using a Ficoll-Hypaque density gradient

centrifugation (Sigma-Aldrich). Isolated cells were cultured in RPMI 1640 medium containing 10% FBS, 1 mmol/L L-glutamine and 50 µg/mL penicillin/streptomycin. Normal human adult bone marrow mesenchymal stromal cells (MSC) were isolated from bone marrow aspirates from the iliac crest of healthy volunteers after informed consent according to institutional guidelines of the Declaration of Helsinki. MSC isolation, expansion and purification were performed according to a previously described protocol (1); enriched MSC were maintained in  $\alpha$ -minimum essential medium ( $\alpha$ -MEM; Thermo Fisher Scientific) supplemented with 20% FBS, 1 mmol/L L-glutamine and 50 µg/mL penicillin/streptomycin.

### Co-culture of leukemic cells and MSC

MSCs were plated and cultured in  $\alpha$ -MEM medium (20% FBS, 1 mmol/L L-glutamine and 50 µg/mL penicillin/streptomycin) overnight. After removal of the culture medium, leukemic cells were seeded on top of MSC at a ratio of 1:100 (MSC: leukemic cells) and co-cultured in RPMI-1640 medium (10% FBS, 1 mmol/L L-glutamine and 50 µg/mL penicillin/streptomycin) for 3 hours, after which co-cultures were exposed to single agents or their combinations at the indicated concentrations in normoxia or hypoxia for 48 hours.

To determine the treatment effect on the co-cultured leukemic cells in normoxia or hypoxia conditions, AML cells were harvested and separated from MSC according to a previously described protocol (14). Cell viability was measured by Cell Titer-Glo® Luminescent viability assay. Apoptosis induction on AML cells (CD45+/CD34+) was analyzed by flow cytometry (CD45, BD Pharmingen). Specific apoptosis was calculated as described in the main text.

### Western blot analysis

Antibodies against human p-AKT (Ser473) (phosphorylated AKT(Ser473)), p-AKT(Thr308), p-GSK $\alpha$ / $\beta$ (Ser21/9), p-S6K(Ser240/244), p-PRAS40(Ser246), p-4EBPGSK b1(Thr37/46), AKT, S6K, 4EBP1, PRAS40, and GSK $\beta$  were purchased from Cell Signaling Technology. GAPDH, used as a loading control, was purchased from Abcam.

### CyTOF assay

Cryopreserved peripheral blood mononuclear cells were thawed and rested in 20% FBS RPMI medium that contained heparin (0.1 mg/ml, Alfa Aesar),  $MgSO_4$  (100 mM) and DNase (10 units/ml) (both from Thermo Fisher Scientific) for 1 hour before use. Freshly sorted cells from mouse bone marrow or spleen were rested in 20% FBS RPMI medium for 2 hours before use. Cells with 95% or higher viability were treated with 0.1  $\mu$ M MLN0128 for 60 minutes, stimulated with stem cell factor (SCF; 100 ng/mL), or GM-CSF (100 U/mL), or IL-6 (100 ng/mL) for 5 minutes, and fixed with paraformaldehyde at a final concentration of 1.6% at room temperature for 10 minutes. Cells were washed three times with washing buffer (phosphate-buffered saline [PBS], 0.5% bovine serum albumin [BSA], and 0.02% sodium azide) and resuspended in staining buffer (0.5% BSA-PBS) at a concentration of 1 million cells/35  $\mu$ l. Antibody mix (15  $\mu$ l) against cell surface molecules (Supplementary Table S3) was added to the resuspended cells to the final staining volume of 50  $\mu$ L. Cells were incubated for 30 minutes at

room temperature and washed twice with washing buffer. The pellet was then resuspended in 300  $\mu$ l of 1.6% PFA-PBS, incubated for 10 minutes at room temperature, and spun down at 1000 g for 3 minutes at 4°C. Cells were permeabilized by 1 ml of cold 70% methanol for 10 minutes on ice, washed three times with washing buffer, and resuspended in staining buffer (1 million cells/35  $\mu$ l) before 15  $\mu$ l of antibody mix against intracellular molecules (Supplementary Table S3) was added. Cells were stained for 30 minutes at room temperature. Stained cells were washed three times with washing buffer and incubated with 0.5 ml of 1.6% PFA-PBS containing 250 nM Ir-intercalator for 20 minutes at room temperature or overnight at 4°C. Cells were then washed two times with washing buffer and filtered with distilled water through blue-capped cell strainer tubes (Thermo Fisher Scientific) to remove clumps. Filtered cells were counted and spun down, leaving cell pellets ( $1 \times 10^6$ ) in a residual volume of distilled water (50  $\mu$ l). Eu151/153 beads were added to cells before the cells were transferred to a 96-deep well plate. An autosampler device (Fluidigm Corporation) was used to apply the sample to the CyTOF instrument.

### REFERENCES

1. Kojima K, McQueen T, Chen Y, et al. p53 activation of mesenchymal stromal cells partially abrogates microenvironment-mediated resistance to FLT3 inhibition in AML through HIF-1 $\alpha$ -mediated down-regulation of CXCL12. *Blood* 2011;118:4431-9.

SUPPLEMENTARY FIGURES AND TABLES

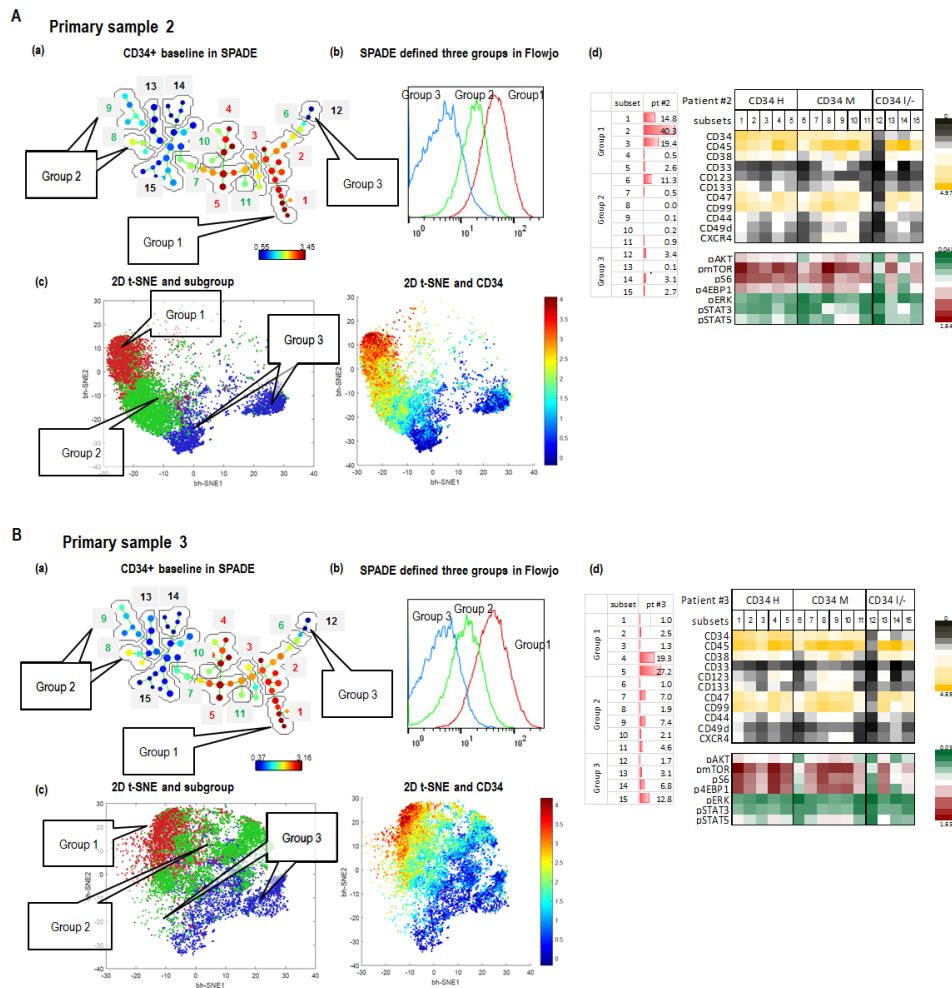

**Supplementary Figure S1: CyTOF identifies the effect of MLN0128 on primary AML stem/progenitor cells (#2 and #3), related to Figure 3.** CyTOF, SPADE and viSNE analysis of the primary AML sample #2 **A.** and #3. **B.** (a) SPADE displays primary sample CD34 baseline expression. Subsets with similar intensity of CD34 were grouped as indicated (groups 1, 2, and 3) with high, medium and low or no expression of CD34. The defined groups were confirmed by FlowJo in histogram graph (b) and by viSNE in 2-D plot (c) showing each group location, geometry (left), and CD34 intensity and distribution (right). (d, left): cell frequency of the defined subsets; (d, right): the baseline expressions of surface and intracellular molecules of the defined subsets.

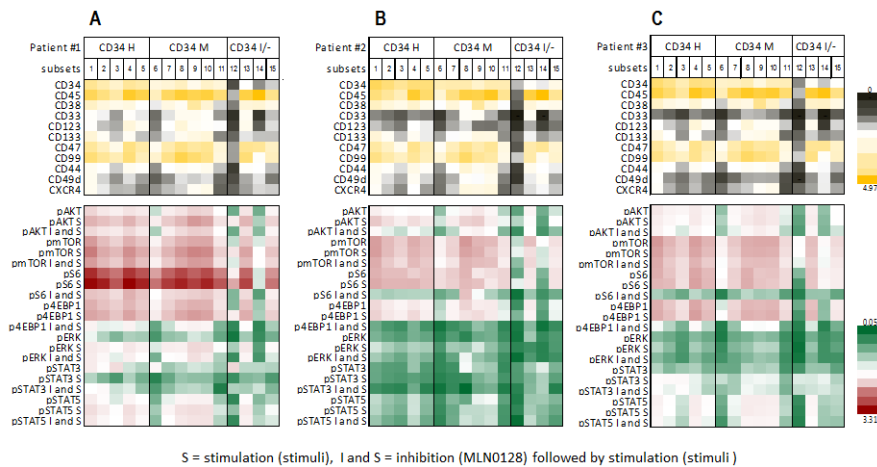

**Supplementary Figure S2: Heatmap summarizes the expression intensity of surface and intracellular molecules in subsets of each group (groups 1, 2, and 3) of three primary samples (1, 2 and 3).** A, B and C. Heatmap of surface markers (black to yellow) was scaled based on the baseline expression intensities of all three samples. Heatmap of intracellular molecules (green to red) was scaled on the expression intensities of baseline, stimulation (stimuli, “S”) and inhibition (MLN0128, “I”) of intracellular markers of all three samples.

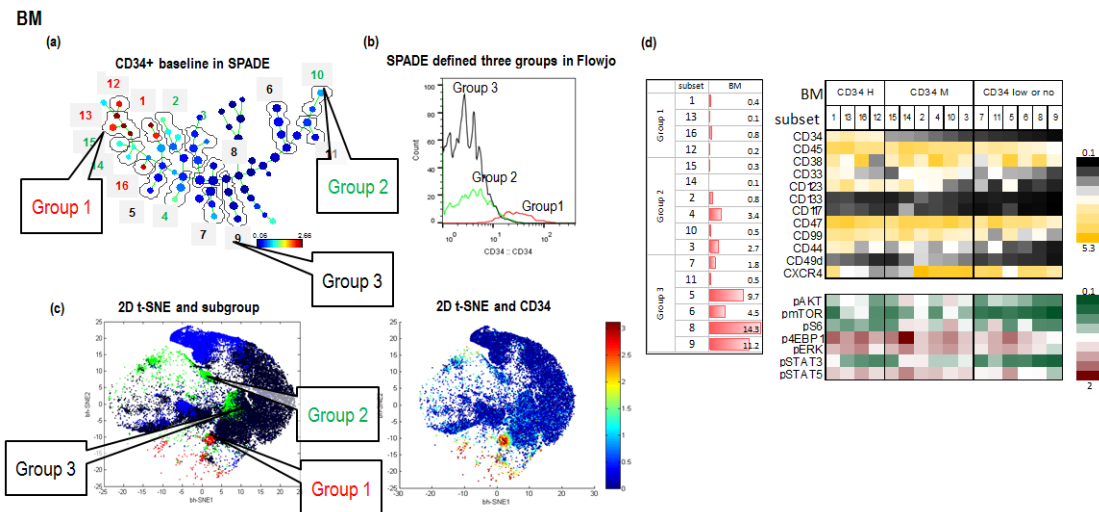

**Supplementary Figure S3: CyTOF identifies the effect of MLN0128 on AML-derived xenograft leukemic cells, related to Figure 5.** SPADE and viSNE analysis of the secondary xenograft primary AML cells (#4) recovered from BM. **a.** SPADE displays CD34 baseline expression. 16 subsets were identified; subsets with similar intensity of CD34 were grouped (groups 1, 2, and 3) as indicated with high, medium and low or no expression of CD34. The defined groups were confirmed by FlowJo in a histogram graph **b.** and by viSNE in a 2-D plot **c.** showing each group location, geometry (left), CD34 intensity and distribution (right). **d. (left):** cell frequency of defined subsets; **d. (right):** baseline expression of surface and intracellular molecules in subsets of each defined group.

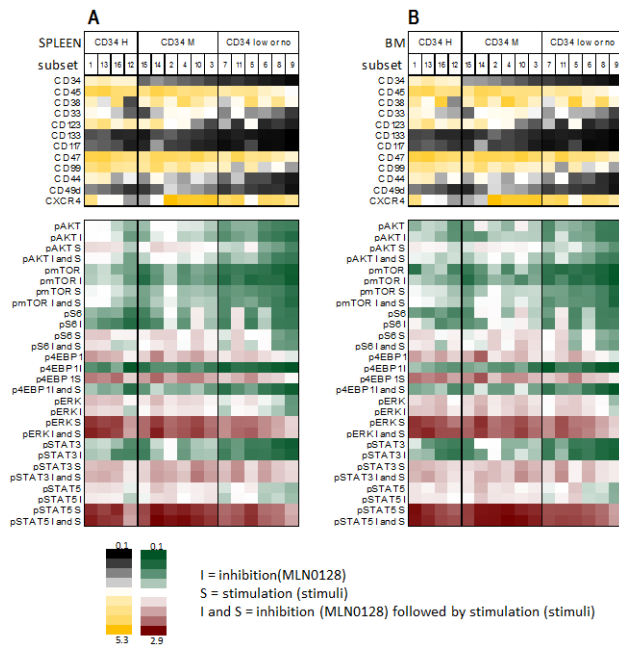

**Supplementary Figure S4: Heatmap summarizes the expression intensity of surface and intracellular molecules in subsets of each group (groups 1, 2, and 3) of samples recovered from spleen A. and BM B.** Heatmap of surface markers (black to yellow) was scaled on the baseline expression intensities of both spleen and bone marrow samples. Heatmap of intracellular molecules (green to red) was scaled on the expression intensities of baseline, inhibition (MLN0128, “I”), stimulation (stimuli, “S”) and inhibition followed by simulation (“I and S”) of both spleen and bone marrow samples.

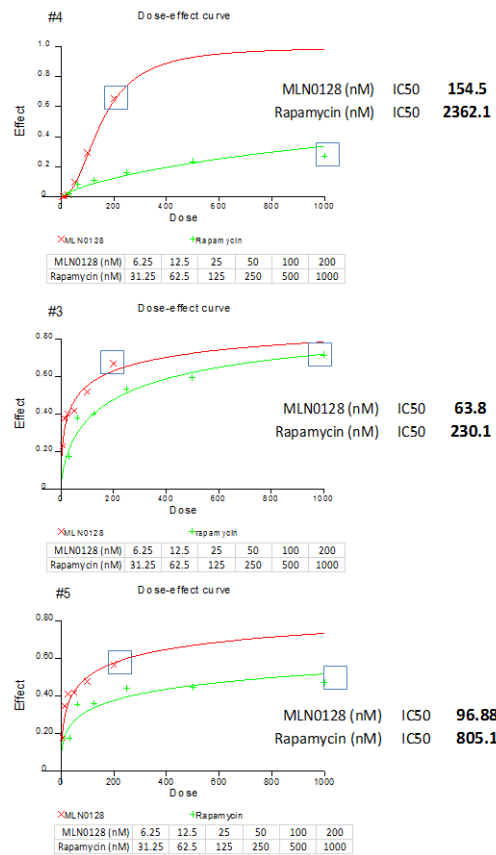

**Supplementary Figure S5: Anti-leukemic efficacy of MLN0128 and rapamycin in primary AML.** Primary AML samples were treated with MLN0128 or rapamycin at the indicated concentration for 72 hours. Apoptosis induction in bulk (#4) and progenitor CD34<sup>+</sup> cells (#3 and #5) was detected by flow cytometry. Specific apoptosis was calculated as described in the methods section. CalcuSyn software was used to determine the IC<sub>50</sub> and generate the dose-effect curve of MLN0128 and rapamycin for each sample. Clinical information on primary AML is included in the Supplementary Table S1, combination apoptosis set B.

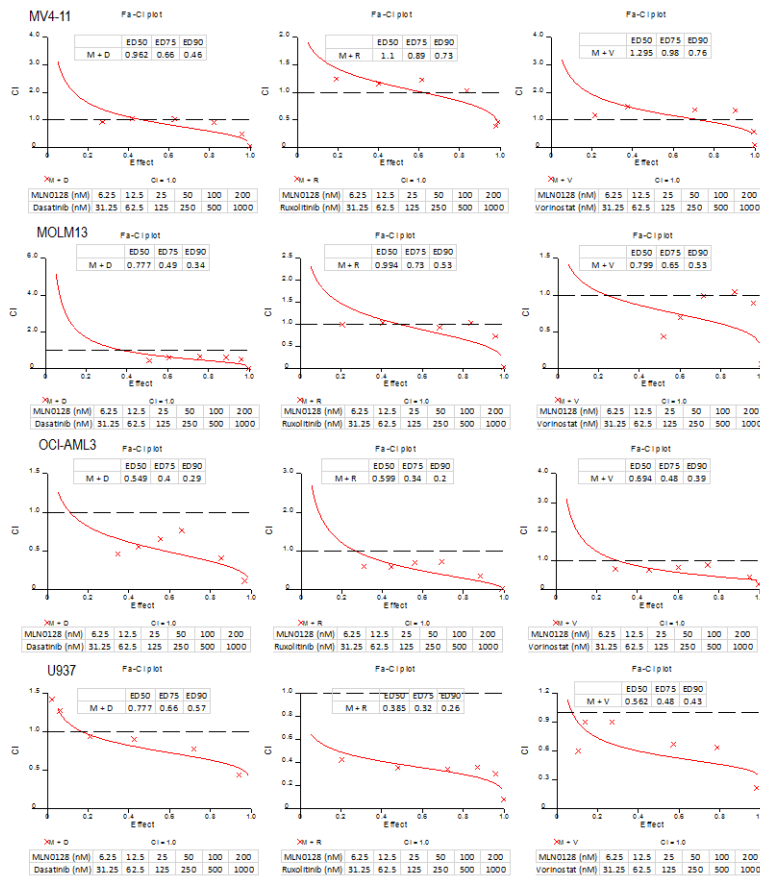

**Supplementary Figure S6: Anti-leukemic effect of dual pathway inhibition in AML, related to Figure 7A.** AML cell lines were treated with single and combined inhibitors at the indicated concentrations for 72 hours. Combination index and combination index plot for each treatment was generated using Calcsyn software. M: MLN0128 D: dasatinib; R: ruxolitinib; V: vorinostat.

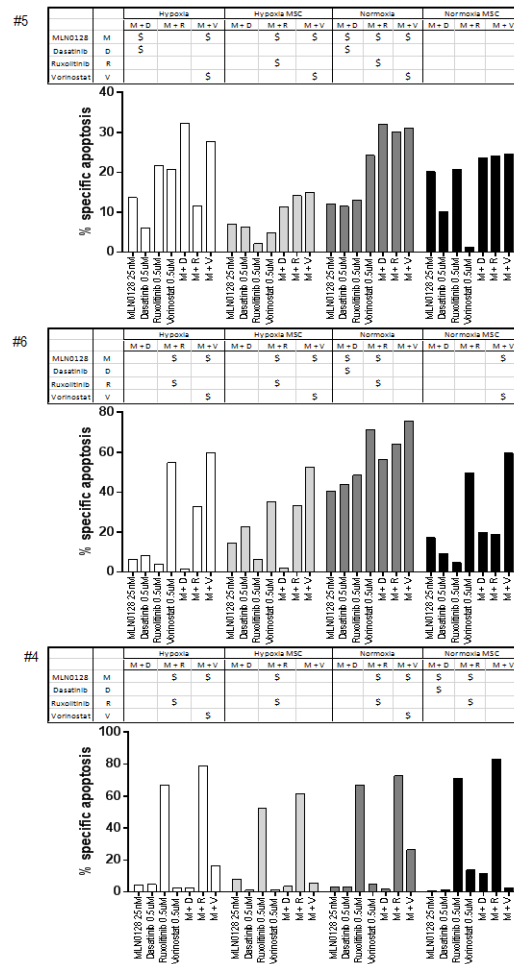

**Supplementary Figure S7: Anti-leukemic efficacy of dual pathway inhibition in AML under conditions mimicking the leukemic microenvironment, related to Figure 8.** Primary AML samples were cultured with or without MSC and treated with MLN0128 (25 nM), dasatinib, ruxolitinib and vorinostat (500 nM) alone and in combination under hypoxia or normoxia for 48 hours. Treatment-induced apoptosis in primary progenitor cells was detected by flow cytometry. Specific apoptosis was calculated as described in the Materials and Methods. \$: Combination-treatment increased apoptosis more than 5% when compared to single agent used alone. MSC: mesenchymal stromal cells. M: MLN0128; D: dasatinib; R: ruxolitinib; V: vorinostat. Clinical information on primary AML is included in the Supplementary Table S1, combination apoptosis set B.



Supplementary Table S1: Clinical information of primary samples used in this study

|                  | UPN     | Blast | Source | Diagnosis | Disease status | FAB    | Sex | molecular diagnosis mutation    | CG karyotype                 |
|------------------|---------|-------|--------|-----------|----------------|--------|-----|---------------------------------|------------------------------|
| <b>Apoptosis</b> |         |       |        |           |                |        |     |                                 |                              |
| #1               | 4277066 | 77    | PB     | AML       | Rel            | M2     | F   | FLT3-ITD                        | Complex                      |
| #2               | 4272402 | 56    | PB     | AML       | ND             | M1     | M   | FLT3-ITD,<br>FLT3-D835,<br>NPM1 | trisomy 4                    |
| #3               | 4037386 | 88    | BM     | AML       | ND             |        | M   |                                 | Diploid                      |
| #4               | 4279490 | 53    | PB     | AML       | Rel            | M1     | F   | FLT3-ITD                        | inv(12)<br>(p11.2p13)        |
| #5               | 4280184 | 36    | BM     | AML       | ND             | M1     | M   |                                 | Complex                      |
| <b>RPPA</b>      |         |       |        |           |                |        |     |                                 |                              |
| #1               | 3738244 | 69    | BM     | AML       | Rel            | M2     | M   | RAS (Q61K)                      | Diploid                      |
| #2               | 3727400 | 97    | PB     | AML       | Rel            | M1     | M   |                                 | t(1;10)<br>(q25;p11.2)       |
| #3               | 3741402 | 63    | BM     | AMML      | ND             |        | M   | NPM1                            | del(9)<br>(q13q22)           |
| #4               | 3616754 | 87    | BM     | AML       | Rel            |        | M   | RAS (N12 GGT-<br>GAT)           | Diploid                      |
| #5               | 3709076 | 88    | BM     | AML       | Rel            |        | M   |                                 | Diploid                      |
| #6               | 3741784 | 90    | BM     | AML       | Rel            |        | M   | FLT3-ITD, NPM1                  | Diploid                      |
| #7               | 3741784 | 90    | PB     | AML       | Rel            |        |     |                                 | trisomy 8                    |
| #8               | 3716342 | 50    | PB     | AML       | Rel            | M2     | F   |                                 | Complex                      |
| #9               | 3740978 | 83    | BM     | AML       | Rel            |        | F   |                                 | Complex                      |
| #10              | 3719866 | 88    | BM     | AMML      | Rel            |        | M   | RAS (N61 CAA-<br>CGA)           | t(11,17;12)<br>(q23,q24;p13) |
| #11              | 2858966 | 80    | BM     | AML       | Rel            | RAEB-T | M   |                                 | Diploid                      |
| #12              | 3732328 | 50    | BM     | AML       | Rel            | M2     | M   | JAK2 (V617F)                    | t(4;12)<br>(q21;p11.2)       |
| #13              | 3746088 | 52    | BM     | AML       | ND             | M2     | F   | FLT3-D835,<br>NPM1              | Diploid                      |
| #14              | 3745360 | 80    | PB     | AMOL      | ND             |        | M   | FLT3-ITD, RAS<br>(G12S)         | t(6;11),<br>complex          |
| #15              | 3718532 | 74    | PB     | AML       | Rel            |        | F   |                                 | t(3;21),<br>complex          |
| #16              | 3747822 | 65    | PB     | AML       | ND             | M0     | M   | RAS (two N12)                   | Diploid                      |
| #17              | 3747422 | 74    | PB     | AML       | ND             | M2     | F   | FLT3-ITD, NPM1,<br>RAS(G12D)    | Diploid                      |
| #18              | 3713098 | 96    | PB     | AML       | Rel            |        | F   | RAS(G12D)                       | t(7;11),<br>complex          |

(Continued)

|                                    | UPN     | Blast | Source | Diagnosis | Disease status | FAB | Sex | molecular diagnosis mutation | CG karyotype                |
|------------------------------------|---------|-------|--------|-----------|----------------|-----|-----|------------------------------|-----------------------------|
| #19                                | 3666302 | 64    | PB     | AML       | Rel            |     | M   |                              | Diploid                     |
| #20                                | 3751002 | 60    | PB     | AML       | ND             | M2  | M   | CBFb-MYH11, FLT3-D835        | Inv 16                      |
| #21                                | 3750998 | 70    | PB     | AML       | ND             | M1  | F   |                              | Diploid                     |
| #22                                | 3715024 | 55    | PB     | AML       | Rel            |     | M   | FLT3-ITD                     | Diploid                     |
| #23                                | 3751374 | 70    | BM     | AMOL      | ND             |     | M   | NPM1, RAS (G12D)             | Diploid                     |
| #24                                | 3749844 | 90    | BM     | AML       | Rel            |     | F   | FLT3-ITD, NPM1               | t(4;11;15)<br>(q21;q13;q25) |
| <b>CyTOF</b>                       |         |       |        |           |                |     |     |                              |                             |
| #1                                 | 3540878 | 83    | PB     | AML       | Rel            |     | F   | FLT3-ITD, NPM1               | Diploid                     |
| #2                                 | 3798414 | 91    | PB     | AML       | Rel            |     | M   | RAS (N12 GGT-GCT)            | DEL(12)<br>(P11.2P13)       |
| #3                                 | 3873322 | 67    | PB     | AML       | Rel            |     | M   |                              | Diploid                     |
| #4                                 | 3705512 | 83    | PB     | AML       | Rel/Ref        | M5  | F   | FLT3-ITD, NPM1               | Diploid                     |
| #5                                 | 3705658 | 90    | PB     | AML       | Rel/Ref        | M2  | F   | FLT3-ITD                     | Diploid                     |
| <b>Western blot and apoptosis</b>  |         |       |        |           |                |     |     |                              |                             |
| #1                                 | 3615740 | 95    | PB     | AML       | ND             |     | F   |                              | Diploid                     |
| <b>Combination apoptosis set A</b> |         |       |        |           |                |     |     |                              |                             |
| #1                                 | 4277066 | 77    | PB     | AML       | ND             | M2  | M   | RUNX1-RUNX1T1                | t(8;21)                     |
| #2                                 | 4035774 | 74    | PB     | AML       | ND             | M1  | F   | FLT3-ITD                     | Diploid                     |
| #3                                 | 4038554 | 77    | PB     | AML       | Rel            |     | M   |                              | Complex                     |
| #4                                 | 4104240 | 89    | PB     | Bipheno   | Rel            |     | M   |                              | t(9;22)<br>(q34;q11.2)      |
| #5                                 | 4073736 | 83    | BM     | AML       | Rel/Ref        |     | F   | NPM1, FLT3 ITD and CEBPA     |                             |
| #6                                 | 4041728 | 95    | PB     | AMML      | ND             |     | M   |                              | Complex                     |
| #7                                 | 4049848 | 97    | PB     | AML       | Rel            |     | M   |                              | t(6;11),<br>complex         |
| #8                                 | 4149804 | 92    | BM     | AML       | Rel/Ref        |     | M   | p53                          | Complex                     |
| #9                                 | 4099272 | 90    | PB     | AML       | Rel/Ref        |     | M   |                              | Complex                     |
| #10                                | 4111142 | 83    | PB     | AML       | Rel/Ref        | M2  | M   | RUNX1, NRAS and EZH2         | trisomy 8                   |
| <b>Combination apoptosis set B</b> |         |       |        |           |                |     |     |                              |                             |
| #1                                 | 4340976 | 92    | PB     | AML       | Ref            |     | F   | FLT3-ITD, FLT3-D835          | t(X;X)<br>(q22;q26)         |
| #2                                 | 4378892 | 74    | BM     | AML       | Ref            | M5  | M   |                              | Complex<br>(Continued)      |

|    | UPN     | Blast | Source | Diagnosis | Disease status | FAB | Sex | molecular diagnosis mutation  | CG karyotype |
|----|---------|-------|--------|-----------|----------------|-----|-----|-------------------------------|--------------|
| #3 | 4064236 | 97    | PB     | AML       | Ref            |     | M   |                               | Complex      |
| #4 | 4522842 | 51    | PB     | AML       | Ref            | M4  | F   | FLT3-D835, RAS K: (G12V)      | Diploid      |
| #5 | 4095764 | 48    | PB     | AML       | Ref            |     | M   | JAK2 (V617F)                  | Complex      |
| #6 | 4522324 | 55    | BM     | AML       | Ref            |     | M   | RAS, K(G12D), N (G12D+S,G13D) | Diploid      |

**CG Karyotype:** Cytogenetic Karyotype; **ND:** newly diagnosed; **Rel:** relapsed; **Ref:** refractory; **CBFb-MYH11:** fusion genes of CBFb and YMH11.

### Supplementary Table S2: Antibodies used in RPPA

See Supplementary File 1

### Supplementary Table S3: Antibodies used in CyTOF

| Antibody                   | Source                    | Catalog #   |
|----------------------------|---------------------------|-------------|
| CD45                       | DVS-Sunnyvale/Fluidigm    | 3154001B    |
| CD38                       | BioLegend                 | 303502      |
| CD33                       | DVS-Sunnyvale/Fluidigm    | 3158001B    |
| CD34                       | eBioscience               | 14-0349-82  |
| CD117                      | DVS-Sunnyvale/Fluidigm    | 3143001B    |
| CD123                      | DVS-Sunnyvale/Fluidigm    | 3151001B    |
| CD133                      | Miltenyi                  | 130-090-851 |
| CD47                       | BioLegend                 | 323102      |
| CD99                       | BD Biosciences            | 555687      |
| CD44                       | DVS-Sunnyvale/Fluidigm    | 3166001B    |
| CD49d                      | DVS-Sunnyvale/Fluidigm    | 3141004B    |
| CXCR4                      | DVS-Sunnyvale/Fluidigm    | 3175001B    |
| <u>p-AKT Ser473</u>        | BD Biosciences            | 560397      |
| <u>P-mTOR Ser2448</u>      | Cell signaling technology | 5536BF      |
| <u>p-S6 Ser235/236</u>     | DVS-Sunnyvale/Fluidigm    | 3172008A    |
| <u>p-4EBP1Thr37/46</u>     | Cell signaling technology | 2855BF      |
| <u>p-ERK Thr202/Tyr204</u> | DVS-Sunnyvale/Fluidigm    | 3167005A    |
| <u>p-Stat3 Tyr705</u>      | Cell signaling technology | 4113BF      |
| <u>p-STAT5 Tyr694</u>      | DVS-Sunnyvale/Fluidigm    | 3150005A    |

Underline indicates antibodies detecting the intracellular molecules

**Supplementary Table S4: List of proteins significantly altered by MLN0128**

See Supplementary File 2

**Supplementary Table S5: Anti-leukemic efficacy of single agents in AML cell lines and primary AML samples****A.**

| <b>IC50 (nM)</b> | <b>MV4-11</b> | <b>MOLM13</b> | <b>OCI-AML3</b> | <b>U937</b> |
|------------------|---------------|---------------|-----------------|-------------|
| MLN0128          | 21.9          | 20.6          | 31.9            | 75.0        |
| Dasatinib        | 269.0         | 195.5         | 1690.2          | 3336.2      |
| Ruxolitinib      | 211.2         | 322.2         | 834.1           | 371.2       |
| Vorinostat       | 114.9         | 197.0         | 333.0           | 1498.5      |

**B.**

| <b>IC50 (nM)</b> | <b>#1</b> | <b>#2</b> | <b>#3</b> | <b>#4</b> | <b>#5</b> |
|------------------|-----------|-----------|-----------|-----------|-----------|
| MLN0128          | 96.9      | 23.9      | 63.8      | 154.5     | 935.2     |
| Dasatinib        | 185.5     | 387.7     | 343       | 3598      | > 10000   |
| Ruxolitinib      | 473.3     | 1604.7    | 258.5     | 38.5      | > 10000   |
| Vorinostat       | 311.0     | 114.0     | 347.2     | 1914.2    | 494.0     |

AML cells were treated with single agent at the indicated concentration for 72 hours. Growth inhibition in cell lines was measured by Cell titer-Glo® luminescent cell viability assay. Apoptosis induction of primary progenitor cells was detected by flow cytometry. Specific apoptosis was calculated as indicated under Methods. The IC<sub>50</sub> of single agents on growth inhibition of cell lines (A) and on apoptosis induction of primary progenitor cells (B) was calculated by CalcuSyn. (Related to Figure 7 A and B)
